# Supplementary material
Source: Springer Nature journal article supplement (https://www.springermedizin.de/resource/supplementary/12936_2008_583_MOESM5_ESM.pdf/9547758)

□ Post coupling ■ Seven months later

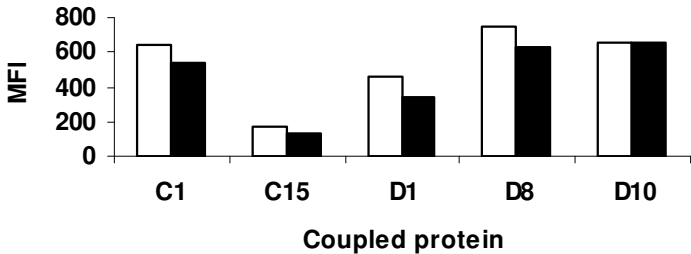

Supplement: MOESM5 [file 9547758]
